# Supplementary material for: Air Quality Improvement in a Megacity: Implications from 2015 Beijing Parade Blue Pollution-Control Actions
Source: Copernicus journal article supplement (doi:10.5194/acp-2016-591), 2016-09-05
Supplement: Supplementary file [file acp-2016-591-AC1-supplement.pdf]

**Anonymous Referee #1**

**General comments**

Recommend publication as it is.

**Response:** [We thank the reviewer's recommendation for publication.](#)
